# Supplementary material for: Phosphine-free synthesis of Zn1−xCdxSe/ZnSe/ZnSexS1−x/ZnS core/multishell structures with bright and stable blue–green photoluminescence
Source: Royal Society of Chemistry journal article supplement (doi:10.1039/c0jm03605f), 2011-01-01
Supplement: c0jm03605f.pdf [file c0jm03605f.pdf]

# Phosphine-Free Synthesis of $\text{Zn}_{1-x}\text{Cd}_x\text{Se}$ / $\text{ZnSe}$ / $\text{ZnSe}_x\text{S}_{1-x}$ / $\text{ZnS}$ Core/Multishell Structures with Bright and Stable Blue–Green Photoluminescence

*Huaibin Shen<sup>1,3</sup>, Changhua Zhou<sup>1</sup>, ShaSha Xu<sup>1</sup>, Cailan Yu<sup>2</sup>,*

*Hongzhe Wang<sup>1</sup>, Xia Chen<sup>3\*</sup>, and Lin Song Li<sup>1\*</sup>*

*<sup>1</sup>Key Laboratory for Special Functional Materials of the Ministry of*

*Education, Henan University, Kaifeng, 475004, P. R. China*

*<sup>2</sup>Key Laboratory of Photochemistry, Institute of Chemistry, Chinese Academy of*

*Sciences, 100080, P. R. China*

*<sup>3</sup>College of Life Science, Jilin University, Changchun, 130021, P. R. China*

E-mail: lsli@henu.edu.cn, bbbbz@163.com.

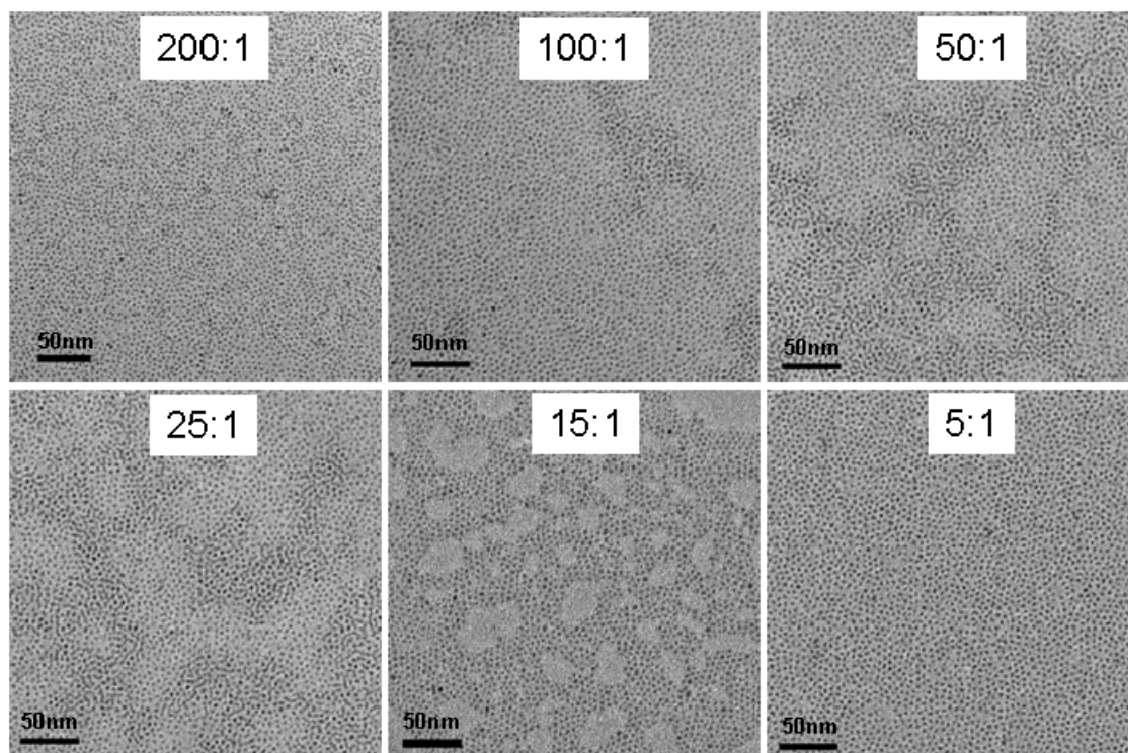

**Figure S1.** TEM images of a series of  $\sim 3.5$  nm  $\text{Zn}_{1-x}\text{Cd}_x\text{Se}$  nanocrystals, which correspond with Figure 1.

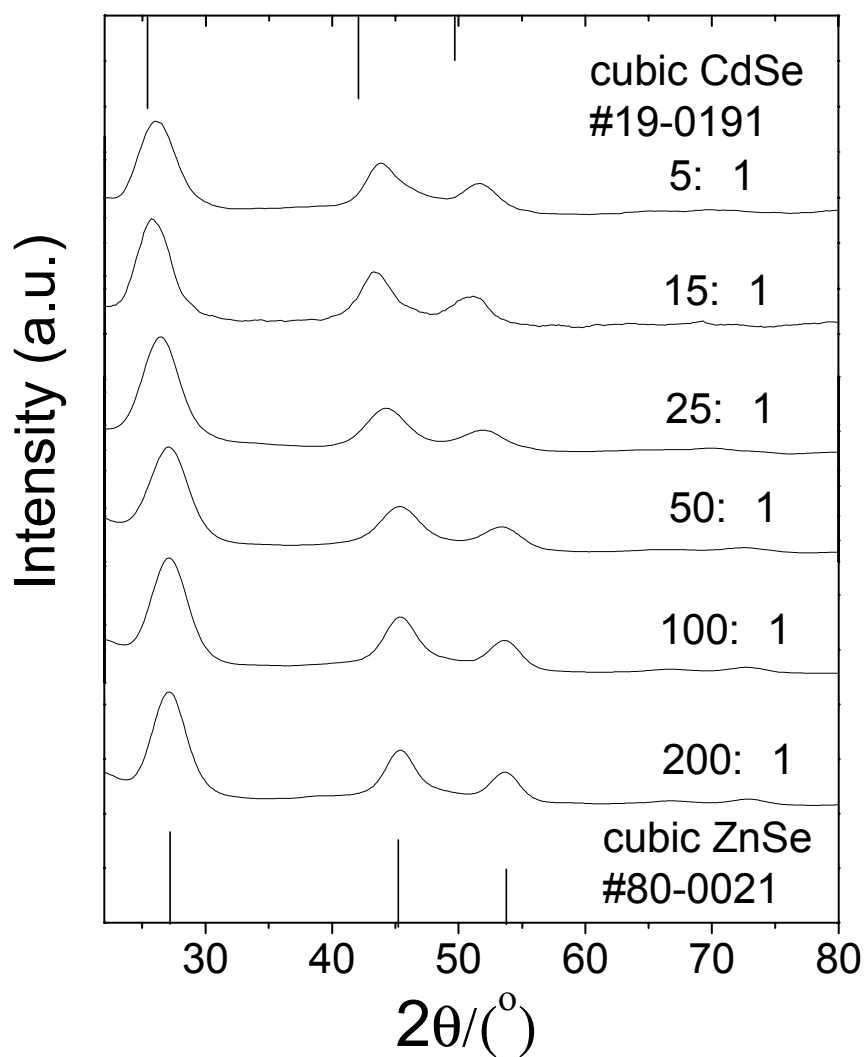

**Figure S2.** Powder XRD patterns of the Zn<sub>x</sub>Cd<sub>1-x</sub>Se samples with different molar ratios of Zn and Cd.

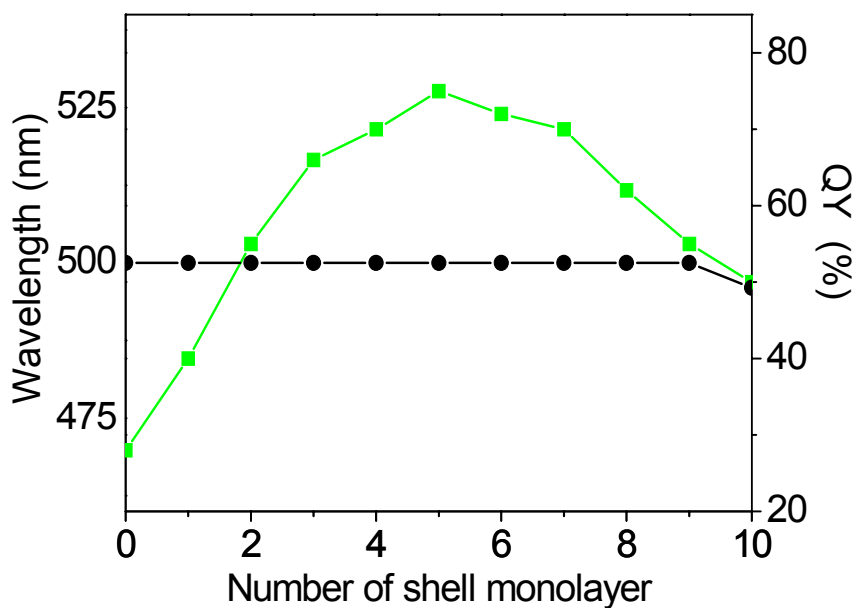

**Figure S3.** Evolution of the PL-peak position (black) and QYs (green) for core-shell nanocrystals.

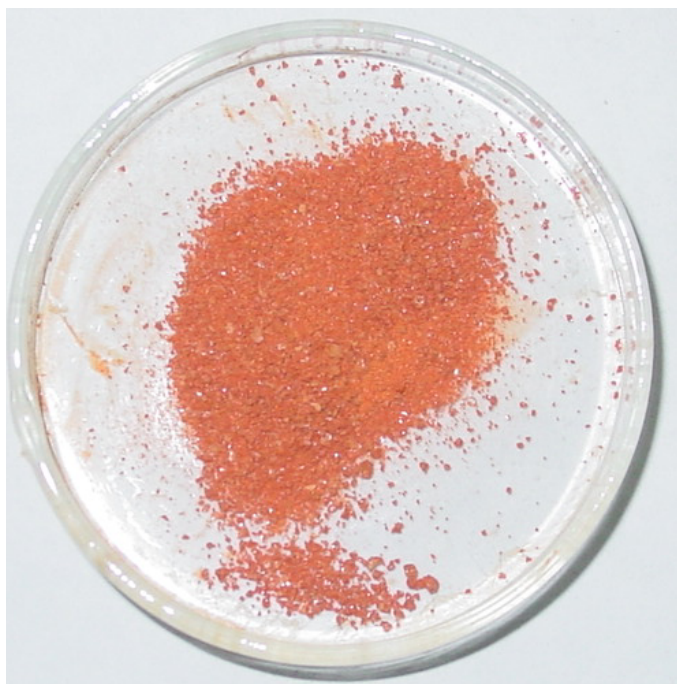

**Figure S4.** A photo of purified powder  $Zn_{1-x}Cd_xSe/ZnSe/ZnSe_xS_{1-x}/ZnS$  core-shell nanocrystals sample (~ 10 g).

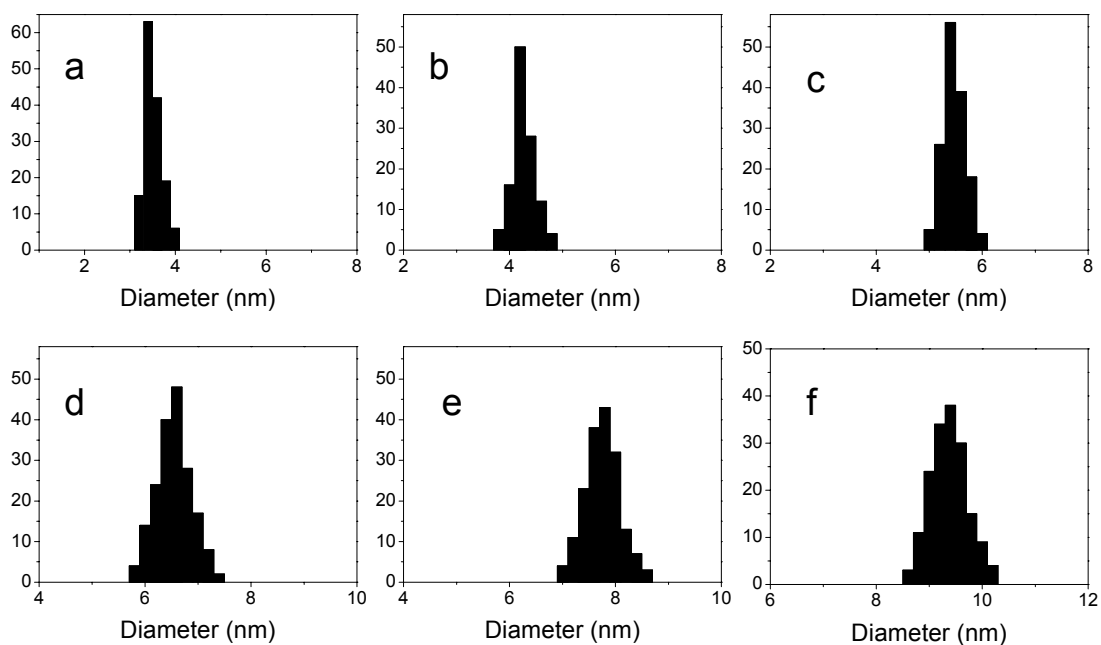

**Figure S5.** The corresponding size-distribution histograms of Figure 5.

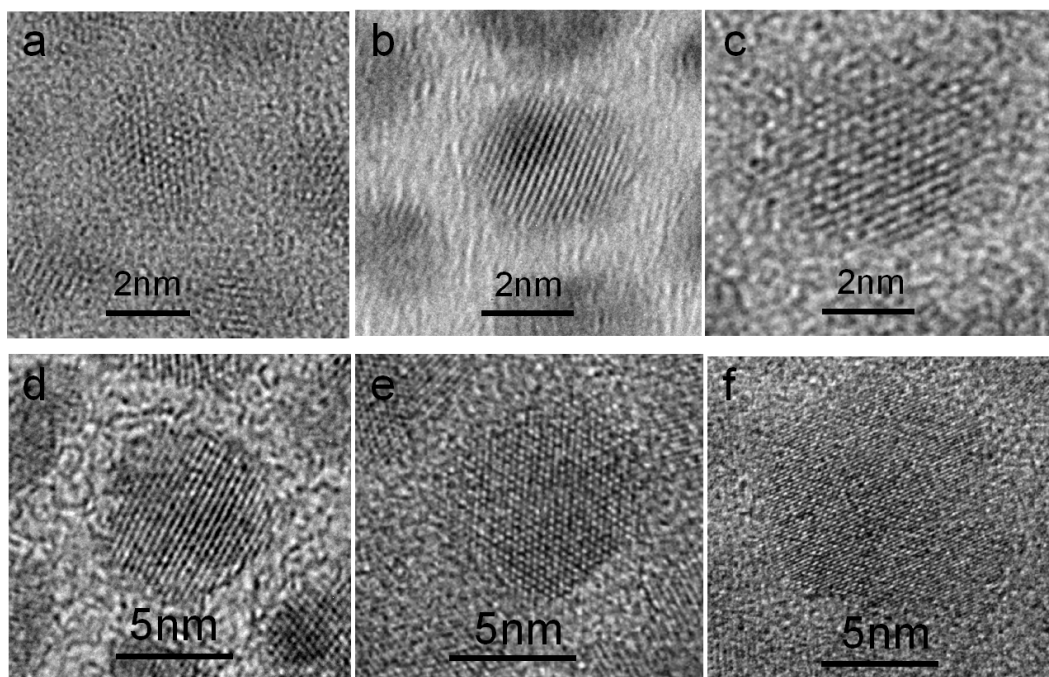

**Figure S6.** High resolution TEM images of Figure 5.

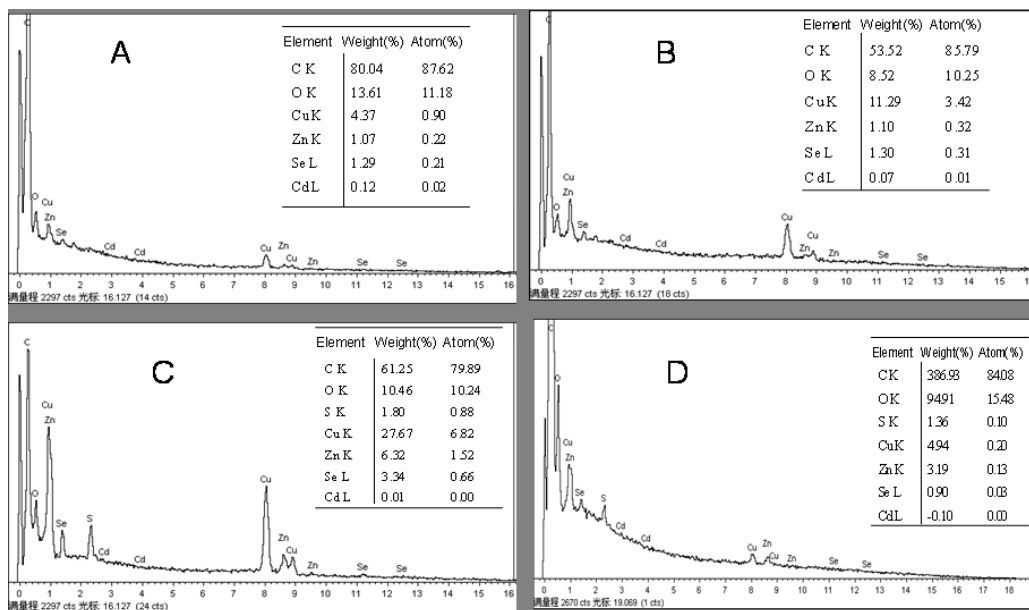

**Figure S7.** EDX spectra of A)  $\text{Zn}_{0.94}\text{Cd}_{0.06}\text{Se}$ , B)  $\text{Zn}_{0.94}\text{Cd}_{0.06}\text{Se}/\text{ZnSe}$ , C)  $\text{Zn}_{0.94}\text{Cd}_{0.06}\text{Se}/\text{ZnSe}/\text{ZnSe}_x\text{S}_{1-x}$ , D)  $\text{Zn}_{0.94}\text{Cd}_{0.06}\text{Se}/\text{ZnSe}/\text{ZnSe}_x\text{S}_{1-x}/\text{ZnS}$  nanocrystals.

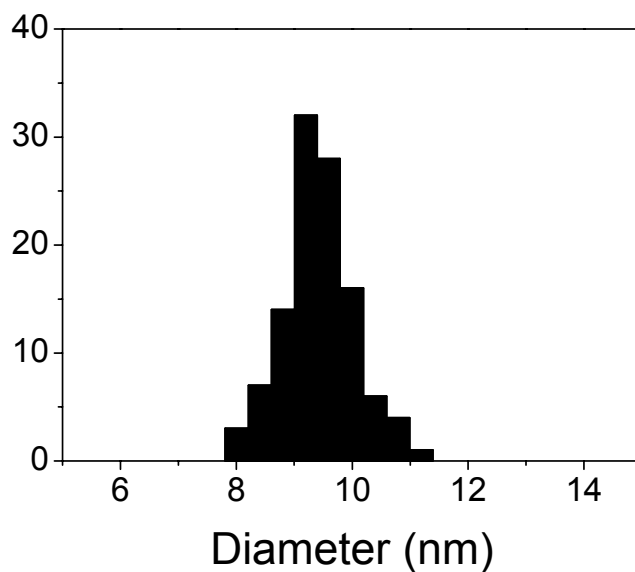

**Figure S8.** The corresponding size-distribution histogram of Figure 7.
